# Supplementary material for: Cardio-Oncologic Mortality Surveillance: Rising Trends of Arrhythmia- Associated Deaths in Lung Cancer Patients, United States 1999-2023
Source: Research Square preprint supplement (doi:10.21203/rs.3.rs-8232781/v1), 2025-12-31
Supplement: Supplementary file 1 [file 264b8ba4af7de029bcd1e77b.docx]

**Supplementary File:**

| **Table 1:** Annual age adjusted mortality rates due to lung cancer and arrhythmias per 100,000 population in adults aged 25+ in the United States, 1999 to 2023 | |
| --- | --- |
| **Year** | **Age Adjusted Mortality Rate per 100,000 population (95% CI)** |
| 1999 | 18.98 (18.33-19.62) |
| 2000 | 19.19 (18.55-19.83) |
| 2001 | 20.06 (19.41-20.71) |
| 2002 | 20.64 (19.98-21.29) |
| 2003 | 20 (19.36-20.64) |
| 2004 | 20.81 (20.16-21.46) |
| 2005 | 20.8 (20.15-21.44) |
| 2006 | 21.26 (20.61-21.9) |
| 2007 | 21.23 (20.59-21.88) |
| 2008 | 21.28 (20.64-21.92) |
| 2009 | 21.01 (20.38-21.64) |
| 2010 | 21.66 (21.02-22.29) |
| 2011 | 22.04 (21.4-22.67) |
| 2012 | 23.43 (22.79-24.07) |
| 2013 | 22.95 (22.32-23.58) |
| 2014 | 23.14 (22.52-23.77) |
| 2015 | 23.58 (22.96-24.21) |
| 2016 | 24.17 (23.54-24.79) |
| 2017 | 24.35 (23.73-24.96) |
| 2018 | 25.06 (24.44-25.67) |
| 2019 | 26.39 (25.76-27.01) |
| 2020 | 28.2 (27.56-28.84) |
| 2021 | 30.4 (29.73-31.07) |
| 2022 | 29.98 (29.34-30.63) |
| 2023 | 29.98 (29.34-30.62) |

| **Table 2:** Age adjusted mortality rates per 100,000 population due to lung cancer and arrhythmias stratified by sex in adults aged 25+ in the United States, 1999 to 2023 | | |
| --- | --- | --- |
| **Age Adjusted Mortality Rate per 100,000 population (95% CI)** | | |
| **Year** | **Female** | **Male** |
| 1999 | 11.55 (10.9-12.2) | 30.1 (28.81-31.4) |
| 2000 | 12.27 (11.6-12.94) | 29.48 (28.21-30.75) |
| 2001 | 12.77 (12.09-13.44) | 30.82 (29.53-32.11) |
| 2002 | 13.69 (12.99-14.39) | 30.99 (29.71-32.26) |
| 2003 | 13.49 (12.8-14.19) | 29.46 (28.23-30.69) |
| 2004 | 14.62 (13.9-15.34) | 29.96 (28.73-31.2) |
| 2005 | 14.17 (13.47-14.87) | 30.35 (29.12-31.58) |
| 2006 | 14.54 (13.84-15.24) | 30.88 (29.66-32.11) |
| 2007 | 14.78 (14.07-15.48) | 30.4 (29.2-31.61) |
| 2008 | 14.42 (13.73-15.11) | 30.88 (29.69-32.08) |
| 2009 | 14.07 (13.39-14.75) | 30.56 (29.37-31.74) |
| 2010 | 15.65 (14.93-16.36) | 29.78 (28.63-30.94) |
| 2011 | 15.62 (14.91-16.32) | 30.83 (29.68-31.99) |
| 2012 | 16.4 (15.69-17.11) | 33.09 (31.9-34.27) |
| 2013 | 16.02 (15.32-16.72) | 32.29 (31.14-33.43) |
| 2014 | 16.52 (15.82-17.22) | 31.8 (30.68-32.92) |
| 2015 | 17.5 (16.78-18.21) | 31.67 (30.56-32.77) |
| 2016 | 17.45 (16.75-18.16) | 33.03 (31.92-34.15) |
| 2017 | 16.78 (16.1-17.46) | 34.27 (33.16-35.39) |
| 2018 | 18.22 (17.52-18.92) | 33.89 (32.8-34.98) |
| 2019 | 19.1 (18.39-19.81) | 35.82 (34.72-36.93) |
| 2020 | 20.55 (19.83-21.28) | 38.06 (36.93-39.18) |
| 2021 | 21.78 (21.02-22.54) | 41.72 (40.52-42.92) |
| 2022 | 22.55 (21.81-23.3) | 39.65 (38.51-40.78) |
| 2023 | 22.86 (22.11-23.61) | 39.09 (37.97-40.2) |

| **Table 3:** Age adjusted mortality rates per 100,000 population due to lung cancer and arrhythmias stratified by region in adults aged 25+ in the United States, 1999 to 2023 | | | | |
| --- | --- | --- | --- | --- |
| **Age Adjusted Mortality Rate per 100,000 population (95% CI)** | | | | |
| **Year** | **Northeast** | **Midwest** | **South** | **West** |
| 1999 | 20.44 (18.99-21.89) | 20.79 (19.41-22.17) | 17.93 (16.88-18.98) | 17.15 (15.77-18.52) |
| 2000 | 20.63 (19.18-22.08) | 20.57 (19.2-21.93) | 19 (17.92-20.08) | 16.46 (15.12-17.8) |
| 2001 | 20.39 (18.95-21.82) | 21.94 (20.53-23.34) | 19.58 (18.5-20.66) | 18.32 (16.93-19.71) |
| 2002 | 22.3 (20.8-23.79) | 22.54 (21.12-23.96) | 19.61 (18.53-20.69) | 18.63 (17.24-20.02) |
| 2003 | 19.81 (18.41-21.21) | 21.55 (20.16-22.93) | 19.95 (18.87-21.02) | 18.67 (17.3-20.05) |
| 2004 | 21.67 (20.21-23.14) | 23.25 (21.82-24.67) | 19.71 (18.65-20.77) | 19.28 (17.9-20.67) |
| 2005 | 21.41 (19.96-22.86) | 23.27 (21.85-24.69) | 19.59 (18.54-20.64) | 19.6 (18.22-20.98) |
| 2006 | 22.34 (20.86-23.81) | 21.86 (20.49-23.23) | 21.26 (20.18-22.34) | 19.61 (18.24-20.98) |
| 2007 | 20.98 (19.56-22.41) | 24.31 (22.87-25.75) | 20.69 (19.64-21.75) | 19.19 (17.84-20.53) |
| 2008 | 20.62 (19.22-22.03) | 22.84 (21.46-24.22) | 21.22 (20.17-22.28) | 20.34 (18.97-21.71) |
| 2009 | 20.89 (19.48-22.3) | 23.02 (21.64-24.4) | 21.1 (20.06-22.14) | 18.88 (17.58-20.18) |
| 2010 | 21.74 (20.31-23.17) | 24.4 (22.99-25.82) | 20.82 (19.79-21.85) | 19.97 (18.64-21.3) |
| 2011 | 22.12 (20.68-23.56) | 24.43 (23.02-25.84) | 21.03 (20.01-22.05) | 21.34 (19.99-22.69) |
| 2012 | 23.63 (22.16-25.1) | 23.8 (22.43-25.18) | 23.99 (22.92-25.07) | 21.85 (20.51-23.19) |
| 2013 | 23.06 (21.62-24.5) | 24.37 (22.98-25.75) | 23.11 (22.07-24.15) | 21.14 (19.84-22.44) |
| 2014 | 23.17 (21.73-24.6) | 25.02 (23.64-26.4) | 23.61 (22.58-24.64) | 20.38 (19.12-21.64) |
| 2015 | 23.55 (22.11-25) | 26.2 (24.8-27.61) | 23.5 (22.48-24.52) | 21.19 (19.93-22.45) |
| 2016 | 23 (21.59-24.41) | 25.41 (24.03-26.78) | 24.77 (23.75-25.8) | 22.79 (21.5-24.09) |
| 2017 | 22.08 (20.72-23.44) | 26.12 (24.75-27.49) | 25.63 (24.61-26.66) | 22.32 (21.06-23.58) |
| 2018 | 22.96 (21.59-24.33) | 27.09 (25.71-28.46) | 27 (25.96-28.04) | 21.49 (20.27-22.71) |
| 2019 | 23.64 (22.26-25.02) | 28.48 (27.08-29.88) | 27.54 (26.51-28.58) | 24.7 (23.42-25.98) |
| 2020 | 25.74 (24.32-27.16) | 30.36 (28.93-31.79) | 30.44 (29.37-31.51) | 24.32 (23.07-25.57) |
| 2021 | 26.26 (24.82-27.7) | 34.98 (33.42-36.55) | 32.08 (30.96-33.19) | 26.79 (25.45-28.13) |
| 2022 | 25.73 (24.33-27.12) | 32.51 (31.04-33.98) | 32.21 (31.12-33.29) | 27.4 (26.09-28.7) |
| 2023 | 25.7 (24.32-27.09) | 32.13 (30.68-33.58) | 33.11 (32.02-34.2) | 26.25 (24.98-27.52) |

| **Table 4:** Age adjusted mortality rates per 100,000 population stratified due to lung cancer and arrhythmias by metropolitan status in adults aged 25+ in the United States, 1999 to 2020 | | |
| --- | --- | --- |
| **Age Adjusted Mortality Rate per 100,000 population (95% CI)** | | |
| **Year** | **Metropolitan** | **Non-metropolitan** |
| 1999 | 18.9 (18.19-19.61) | 19.26 (17.77-20.74) |
| 2000 | 18.95 (18.24-19.66) | 20.23 (18.72-21.75) |
| 2001 | 19.75 (19.03-20.46) | 21.34 (19.79-22.89) |
| 2002 | 20.31 (19.59-21.03) | 22.06 (20.49-23.63) |
| 2003 | 19.98 (19.27-20.7) | 20.27 (18.78-21.77) |
| 2004 | 20.31 (19.6-21.02) | 23.11 (21.52-24.7) |
| 2005 | 20.52 (19.81-21.23) | 22.13 (20.58-23.68) |
| 2006 | 21.04 (20.33-21.75) | 22.33 (20.79-23.88) |
| 2007 | 20.55 (19.85-21.25) | 24.34 (22.73-25.95) |
| 2008 | 20.69 (19.99-21.38) | 23.79 (22.22-25.36) |
| 2009 | 20.06 (19.38-20.74) | 25.32 (23.7-26.94) |
| 2010 | 20.99 (20.3-21.68) | 24.64 (23.05-26.24) |
| 2011 | 21.46 (20.77-22.15) | 24.81 (23.23-26.39) |
| 2012 | 22.52 (21.83-23.22) | 27.8 (26.13-29.47) |
| 2013 | 22.24 (21.56-22.92) | 26.33 (24.73-27.93) |
| 2014 | 22.3 (21.63-22.98) | 27.16 (25.56-28.76) |
| 2015 | 22.6 (21.92-23.27) | 28.37 (26.73-30.01) |
| 2016 | 23.15 (22.48-23.82) | 29.12 (27.47-30.76) |
| 2017 | 23.2 (22.54-23.87) | 30.01 (28.36-31.66) |
| 2018 | 23.56 (22.91-24.22) | 32.53 (30.83-34.23) |
| 2019 | 25.06 (24.39-25.73) | 33.08 (31.38-34.79) |
| 2020 | 26.41 (25.73-27.08) | 37.3 (35.5-39.09) |

| **Table 4:** Age adjusted mortality rates per 100,000 population due to lung cancer and arrhythmias stratified by race in adults aged 25+ in the United States, 1999 to 2023 | | | | |
| --- | --- | --- | --- | --- |
| **Age Adjusted Mortality Rate per 100,000 population (95% CI)** | | | | |
| **Year** | **NH Black or African American** | **NH White** | **Hispanic or Latino** | **NH Asian or Pacific Islander** |
| 1999 | 17.8 (15.65-19.95) | 19.92 (19.2-20.63) | 5.84 (4.29-7.77) | 11.86 (8.55-16.04) |
| 2000 | 15.91 (13.87-17.95) | 20.54 (19.81-21.26) | 6.99 (5.29-9.05) | 6.67 (4.36-9.78) |
| 2001 | 16.43 (14.38-18.47) | 21.62 (20.88-22.36) | 7.3 (5.56-9.42) | 7.52 (5.11-10.68) |
| 2002 | 16.35 (14.33-18.37) | 22.32 (21.57-23.07) | 6.6 (5.03-8.49) | 9.11 (6.54-12.36) |
| 2003 | 18.76 (16.61-20.92) | 21.5 (20.77-22.23) | 5.16 (3.8-6.84) | 8.06 (5.7-11.06) |
| 2004 | 20.34 (18.14-22.55) | 22.18 (21.44-22.92) | 7.68 (6.01-9.67) | 8.91 (6.5-11.92) |
| 2005 | 15.95 (14-17.91) | 22.59 (21.85-23.34) | 8.76 (7.04-10.76) | 11.11 (8.42-14.4) |
| 2006 | 18.86 (16.77-20.95) | 22.94 (22.2-23.69) | 6.73 (5.3-8.44) | 12.57 (9.82-15.85) |
| 2007 | 16.66 (14.71-18.62) | 23.35 (22.6-24.1) | 6.51 (5.15-8.12) | 7.67 (5.66-10.17) |
| 2008 | 17.64 (15.66-19.62) | 23.19 (22.45-23.93) | 7.73 (6.23-9.48) | 10.21 (7.85-13.06) |
| 2009 | 17.95 (15.98-19.92) | 22.98 (22.25-23.71) | 6.55 (5.22-8.1) | 9.46 (7.25-12.12) |
| 2010 | 18.05 (16.09-20) | 23.66 (22.92-24.4) | 7.96 (6.45-9.47) | 9.19 (7.08-11.73) |
| 2011 | 16.88 (15-18.77) | 24.32 (23.58-25.07) | 8.92 (7.41-10.44) | 10.41 (8.27-12.94) |
| 2012 | 18.75 (16.82-20.69) | 25.97 (25.21-26.73) | 8.04 (6.6-9.48) | 10.76 (8.61-13.29) |
| 2013 | 17.57 (15.73-19.41) | 25.33 (24.58-26.07) | 9.61 (8.09-11.13) | 13.28 (10.83-15.73) |
| 2014 | 19.3 (17.42-21.17) | 25.59 (24.85-26.33) | 8.59 (7.2-9.99) | 9.34 (7.5-11.5) |
| 2015 | 17.21 (15.46-18.97) | 26.66 (25.9-27.41) | 7.08 (5.88-8.28) | 10.42 (8.4-12.44) |
| 2016 | 19.41 (17.56-21.26) | 27.03 (26.28-27.78) | 8.86 (7.52-10.2) | 11.14 (9.12-13.16) |
| 2017 | 17.82 (16.09-19.55) | 27.63 (26.88-28.37) | 8.14 (6.9-9.37) | 11.86 (9.84-13.87) |
| 2018 | 18.63 (16.88-20.37) | 28.49 (27.75-29.24) | 9.85 (8.51-11.19) | 9.15 (7.44-10.86) |
| 2019 | 18.72 (17.01-20.42) | 30.19 (29.43-30.96) | 8.93 (7.67-10.19) | 11.53 (9.65-13.4) |
| 2020 | 20.78 (19.01-22.55) | 32.4 (31.62-33.19) | 9.63 (8.38-10.88) | 11.11 (9.32-12.9) |
| 2021 | 23.25 (21.35-25.16) | 34.89 (34.06-35.72) | 10.91 (9.58-12.25) | 14.07 (11.98-16.15) |
| 2022 | 23.48 (21.62-25.35) | 34.48 (33.68-35.29) | 10.25 (8.98-11.51) | 13.57 (11.6-15.53) |
| 2023 | 25.46 (23.53-27.38) | 34.32 (33.53-35.12) | 11.17 (9.87-12.47) | 12.9 (11.01-14.78) |

| **Table 6:** Age adjusted mortality rates per 100,000 population due to lung cancer and arrhythmias stratified by State in adults aged 25+ in the United States, 1999 to 2023 | | | |
| --- | --- | --- | --- |
| **State** | **Age Adjusted Rate** | **Rank** | **Percent** |
| Nebraska | 41.485 | 1 | 100.00% |
| Kentucky | 40.87 | 2 | 98.00% |
| Oregon | 38.95 | 3 | 96.00% |
| Oklahoma | 38.225 | 4 | 94.00% |
| Minnesota | 37.98 | 5 | 92.00% |
| West Virginia | 37.81 | 6 | 90.00% |
| Vermont | 35.97 | 7 | 88.00% |
| Indiana | 35.105 | 8 | 86.00% |
| Tennessee | 34.715 | 9 | 84.00% |
| Maryland | 33.49 | 10 | 82.00% |
| Maine | 33.43 | 11 | 80.00% |
| South Dakota | 32.85 | 12 | 78.00% |
| South Carolina | 32.605 | 13 | 76.00% |
| Mississippi | 31.52 | 14 | 74.00% |
| Washington | 31.315 | 15 | 72.00% |
| Arkansas | 31.245 | 16 | 70.00% |
| Ohio | 31.17 | 17 | 68.00% |
| Iowa | 31.105 | 18 | 66.00% |
| Texas | 30.825 | 19 | 64.00% |
| Rhode Island | 30.775 | 20 | 62.00% |
| North Dakota | 30.54 | 21 | 60.00% |
| Idaho | 29.815 | 22 | 58.00% |
| Pennsylvania | 29.42 | 23 | 56.00% |
| Colorado | 29.29 | 24 | 54.00% |
| North Carolina | 29.01 | 25 | 52.00% |
| Missouri | 28.805 | 26 | 50.00% |
| Wisconsin | 28.39 | 27 | 48.00% |
| Delaware | 28.155 | 28 | 46.00% |
| New Hampshire | 27.96 | 29 | 44.00% |
| Alaska | 27.56 | 30 | 42.00% |
| Wyoming | 26.155 | 31 | 40.00% |
| Michigan | 25.11 | 32 | 38.00% |
| Virginia | 24.995 | 33 | 36.00% |
| Massachusetts | 23.99 | 34 | 34.00% |
| Montana | 23.875 | 35 | 32.00% |
| Louisiana | 23.635 | 36 | 30.00% |
| Alabama | 23.435 | 37 | 28.00% |
| New Jersey | 23.41 | 38 | 26.00% |
| California | 22.725 | 39 | 24.00% |
| Connecticut | 22.68 | 40 | 22.00% |
| Kansas | 22.5 | 41 | 20.00% |
| Florida | 20.635 | 42 | 18.00% |
| Illinois | 20.29 | 43 | 16.00% |
| District of Columbia | 19.355 | 44 | 14.00% |
| New York | 18.845 | 45 | 12.00% |
| Georgia | 18.635 | 46 | 10.00% |
| Hawaii | 18.13 | 47 | 8.00% |
| Nevada | 17.31 | 48 | 6.00% |
| Arizona | 16.715 | 49 | 4.00% |
| New Mexico | 14.885 | 50 | 2.00% |
| Utah | 10.4 | 51 | 0.00% |

| **Table 7:** Age adjusted mortality rates per 100,000 population due to lung cancer and arrhythmias stratified by 20 year age group in adults aged 25+ in the United States, 1999 to 2023 | | | |
| --- | --- | --- | --- |
| **Age Adjusted Mortality Rate per 100,000 population (95% CI)** | | | |
| **Year** | **25-54 years** | **55-74 years** | **75+ years** |
| 1999 | 0.67 (0.53-0.83) | 34.57 (32.81-36.34) | 110.72 (105.63-115.82) |
| 2000 | 0.63 (0.5-0.79) | 32.84 (31.12-34.56) | 117.68 (112.46-122.89) |
| 2001 | 0.82 (0.66-0.98) | 34.74 (32.98-36.5) | 120.79 (115.55-126.03) |
| 2002 | 0.8 (0.65-0.96) | 35.14 (33.39-36.9) | 126.08 (120.77-131.4) |
| 2003 | 0.85 (0.7-1.01) | 33.33 (31.63-35.03) | 123.51 (118.28-128.74) |
| 2004 | 0.79 (0.64-0.94) | 35.44 (33.7-37.18) | 127.25 (121.97-132.53) |
| 2005 | 0.93 (0.77-1.09) | 33.76 (32.08-35.44) | 130.43 (125.13-135.74) |
| 2006 | 0.82 (0.67-0.97) | 34.73 (33.04-36.41) | 133.65 (128.3-138.99) |
| 2007 | 0.96 (0.8-1.12) | 31.67 (30.08-33.26) | 140.18 (134.73-145.63) |
| 2008 | 0.8 (0.65-0.95) | 32.38 (30.81-33.96) | 140.04 (134.62-145.47) |
| 2009 | 0.78 (0.64-0.93) | 31.17 (29.65-32.69) | 140.31 (134.89-145.72) |
| 2010 | 0.92 (0.76-1.08) | 32.5 (30.96-34.03) | 142.91 (137.47-148.36) |
| 2011 | 0.76 (0.62-0.9) | 32.14 (30.64-33.64) | 149.03 (143.52-154.54) |
| 2012 | 1.02 (0.85-1.19) | 34.32 (32.81-35.82) | 156.6 (150.99-162.21) |
| 2013 | 0.98 (0.81-1.14) | 33.62 (32.17-35.08) | 153.47 (147.96-158.97) |
| 2014 | 0.94 (0.78-1.1) | 35.33 (33.87-36.8) | 151.49 (146.06-156.92) |
| 2015 | 0.95 (0.79-1.12) | 34.18 (32.77-35.6) | 159.04 (153.53-164.54) |
| 2016 | 0.82 (0.67-0.98) | 35.63 (34.21-37.05) | 162.55 (157.03-168.06) |
| 2017 | 0.79 (0.64-0.94) | 37.01 (35.59-38.44) | 161.22 (155.81-166.62) |
| 2018 | 0.76 (0.62-0.93) | 36.67 (35.27-38.07) | 169.92 (164.48-175.37) |
| 2019 | 0.92 (0.75-1.08) | 37.93 (36.52-39.34) | 179.82 (174.3-185.35) |
| 2020 | 0.79 (0.63-0.94) | 42.18 (40.72-43.65) | 189.39 (183.79-194.99) |
| 2021 | 0.86 (0.7-1.02) | 42.73 (41.27-44.18) | 211.07 (205.03-217.1) |
| 2022 | 1 (0.82-1.17) | 44.71 (43.22-46.21) | 200.57 (194.91-206.22) |
| 2023 | 1.02 (0.84-1.19) | 43.65 (42.19-45.11) | 203.06 (197.41-208.7) |

| **Table 8:** Annual age adjusted mortality rates per 100,000 population due to lung cancer and atrial fibrillation in adults aged 25+ in the United States, 1999 to 2023 | |
| --- | --- |
| **Year** | **Age Adjusted Mortality Rate per 100,000 population (95% CI)** |
| 1999 | 11.02 (10.53-11.51) |
| 2000 | 11.88 (11.38-12.39) |
| 2001 | 12.18 (11.67-12.69) |
| 2002 | 12.88 (12.36-13.4) |
| 2003 | 12.9 (12.38-13.42) |
| 2004 | 13.95 (13.42-14.49) |
| 2005 | 13.97 (13.44-14.5) |
| 2006 | 14.5 (13.96-15.03) |
| 2007 | 15.31 (14.76-15.86) |
| 2008 | 15.46 (14.92-16.01) |
| 2009 | 15.59 (15.05-16.13) |
| 2010 | 16.27 (15.72-16.82) |
| 2011 | 17.08 (16.52-17.64) |
| 2012 | 18.28 (17.71-18.85) |
| 2013 | 18.08 (17.52-18.64) |
| 2014 | 18.52 (17.96-19.08) |
| 2015 | 19.13 (18.57-19.69) |
| 2016 | 19.85 (19.28-20.42) |
| 2017 | 20.44 (19.87-21.01) |
| 2018 | 21.02 (20.46-21.59) |
| 2019 | 22.15 (21.58-22.72) |
| 2020 | 23.71 (23.13-24.29) |
| 2021 | 25.93 (25.32-26.55) |
| 2022 | 25.64 (25.05-26.24) |
| 2023 | 25.72 (25.12-26.31) |

| **Table 9:** Annual age adjusted mortality rates per 100,000 population due to lung cancer and paroxysmal tachycardia in adults aged 25+ in the United States, 1999 to 2023 | |
| --- | --- |
| **Year** | **Age Adjusted Mortality Rate per 100,000 population (95% CI)** |
| 1999 | 1.05 (0.9-1.2) |
| 2000 | 1.14 (0.99-1.3) |
| 2001 | 1.08 (0.93-1.23) |
| 2002 | 0.93 (0.8-1.07) |
| 2003 | 0.87 (0.74-1) |
| 2004 | 0.96 (0.82-1.1) |
| 2005 | 0.84 (0.71-0.97) |
| 2006 | 0.74 (0.62-0.86) |
| 2007 | 0.76 (0.64-0.88) |
| 2008 | 0.74 (0.62-0.86) |
| 2009 | 0.69 (0.58-0.8) |
| 2010 | 0.63 (0.52-0.74) |
| 2011 | 0.52 (0.43-0.62) |
| 2012 | 0.61 (0.51-0.71) |
| 2013 | 0.73 (0.62-0.84) |
| 2014 | 0.67 (0.57-0.78) |
| 2015 | 0.7 (0.59-0.8) |
| 2016 | 0.73 (0.63-0.84) |
| 2017 | 0.67 (0.57-0.77) |
| 2018 | 0.68 (0.58-0.78) |
| 2019 | 0.7 (0.59-0.8) |
| 2020 | 0.77 (0.67-0.88) |
| 2021 | 0.82 (0.71-0.92) |
| 2022 | 0.75 (0.65-0.86) |
| 2023 | 0.74 (0.64-0.84) |

| **Table 10:** Annual age adjusted mortality rates per 100,000 population due to lung cancer and right bundle branch block in adults aged 25+ in the United States, 1999 to 2023 | |
| --- | --- |
| **Year** | **Age Adjusted Mortality Rate per 100,000 population (95% CI)** |
| 1999 | 0.14 (0.09-0.2) |
| 2000 | 0.17 (0.12-0.25) |
| 2001 | 0.22 (0.16-0.3) |
| 2002 | 0.19 (0.13-0.26) |
| 2003 | 0.16 (0.11-0.23) |
| 2004 | 0.17 (0.12-0.24) |
| 2005 | 0.3 (0.23-0.39) |
| 2006 | 0.26 (0.19-0.34) |
| 2007 | 0.29 (0.22-0.38) |
| 2008 | 0.33 (0.26-0.42) |
| 2009 | 0.25 (0.19-0.32) |
| 2010 | 0.41 (0.33-0.51) |
| 2011 | 0.48 (0.39-0.57) |
| 2012 | 0.5 (0.41-0.59) |
| 2013 | 0.45 (0.36-0.54) |
| 2014 | 0.52 (0.43-0.61) |
| 2015 | 0.63 (0.53-0.73) |
| 2016 | 0.69 (0.58-0.79) |
| 2017 | 0.68 (0.58-0.78) |
| 2018 | 0.76 (0.66-0.87) |
| 2019 | 0.82 (0.71-0.93) |
| 2020 | 0.95 (0.84-1.07) |
| 2021 | 0.98 (0.86-1.1) |
| 2022 | 1.04 (0.91-1.16) |
| 2023 | 0.93 (0.82-1.05) |

| **Table 11:** Annual age adjusted mortality rates per 100,000 population due to lung cancer and ventricular fibrillation in adults aged 25+ in the United States, 1999 to 2023 | |
| --- | --- |
| **Year** | **Age Adjusted Mortality Rate per 100,000 population (95% CI)** |
| 1999 | 1.19 (1.03-1.35) |
| 2000 | 1.14 (0.98-1.3) |
| 2001 | 1 (0.86-1.15) |
| 2002 | 0.84 (0.71-0.97) |
| 2003 | 0.75 (0.62-0.87) |
| 2004 | 0.7 (0.59-0.82) |
| 2005 | 0.59 (0.48-0.7) |
| 2006 | 0.73 (0.61-0.85) |
| 2007 | 0.51 (0.41-0.61) |
| 2008 | 0.5 (0.41-0.6) |
| 2009 | 0.43 (0.35-0.53) |
| 2010 | 0.42 (0.34-0.52) |
| 2011 | 0.36 (0.29-0.45) |
| 2012 | 0.48 (0.38-0.57) |
| 2013 | 0.38 (0.3-0.46) |
| 2014 | 0.47 (0.38-0.56) |
| 2015 | 0.44 (0.35-0.52) |
| 2016 | 0.46 (0.37-0.54) |
| 2017 | 0.42 (0.34-0.5) |
| 2018 | 0.42 (0.34-0.49) |
| 2019 | 0.46 (0.38-0.54) |
| 2020 | 0.44 (0.36-0.52) |
| 2021 | 0.48 (0.39-0.56) |
| 2022 | 0.4 (0.32-0.47) |
| 2023 | 0.41 (0.33-0.48) |

| **Table 12:** Annual age adjusted mortality rates per 100,000 population due to lung cancer and other arrhythmias in adults aged 25+ in the United States, 1999 to 2023 | |
| --- | --- |
| **Year** | **Age Adjusted Mortality Rate per 100,000 population (95% CI)** |
| 1999 | 5.73 (5.38-6.08) |
| 2000 | 4.9 (4.57-5.22) |
| 2001 | 5.75 (5.4-6.09) |
| 2002 | 5.83 (5.48-6.17) |
| 2003 | 5.39 (5.06-5.72) |
| 2004 | 5.2 (4.87-5.52) |
| 2005 | 5.14 (4.82-5.46) |
| 2006 | 5.12 (4.8-5.43) |
| 2007 | 4.46 (4.16-4.75) |
| 2008 | 4.36 (4.07-4.64) |
| 2009 | 4.1 (3.83-4.38) |
| 2010 | 4.03 (3.75-4.3) |
| 2011 | 3.68 (3.42-3.94) |
| 2012 | 3.69 (3.43-3.94) |
| 2013 | 3.44 (3.2-3.68) |
| 2014 | 3.02 (2.8-3.25) |
| 2015 | 2.86 (2.64-3.07) |
| 2016 | 2.67 (2.47-2.88) |
| 2017 | 2.31 (2.12-2.49) |
| 2018 | 2.14 (1.96-2.32) |
| 2019 | 2.32 (2.13-2.5) |
| 2020 | 2.56 (2.37-2.75) |
| 2021 | 2.48 (2.29-2.67) |
| 2022 | 2.46 (2.27-2.64) |
| 2023 | 2.44 (2.26-2.62) |
